# Supplementary material
Source: PubMed Central journal article supplement (PMC3652696)
Supplement: jcbfm20131x1.pdf [file jcbfm20131x1.pdf]

Supplemental table: Genes analyzed by quantitative real-time RT-PCR.

| Gene name    | Taqman ID     |
|--------------|---------------|
| ARG1         | Mm00475988_m1 |
| IL-1 $\beta$ | Mm00434228_m1 |
| IL-10        | Mm00439616_m1 |
| IL-12A       | Mm00434165_m1 |
| IL-1Ra       | Mm00446186_m1 |
| IL-6         | Mm00446190_m1 |
| MMP2         | Mm00439506_m1 |
| MMP3         | Mm00440295_m1 |
| MMP9         | Mm00600163_m1 |
| MMP14        | Mm00485054_m1 |
| TIMP1        | Mm00441818_m1 |
| TIMP2        | Mm00441825_m1 |
| TNF $\alpha$ | Mm00443258_m1 |
| YM1          | Mm00657889_mH |
